# Supplementary material for: Electrochemical investigation of hydroxyapatite-lanthanum strontium cobalt ferrite composites (HA-LSCF) for SARS-CoV-2 aptasensors.
Source: Royal Society of Chemistry journal article supplement (doi:10.1039/d3ra01531a), 2023-06-29
Supplement: d3ra01531a1.pdf [file d3ra01531a1.pdf]

Supplementary Information

**Electrochemical Investigation of Hydroxyapatite-Lanthanum  
Strontium Cobalt Ferit Composites (HA-LSCF) for SARS-CoV-2  
Aptasensor**

Yeni Wahyuni Hartati<sup>\*a</sup>, Melania Janisha Devi<sup>a</sup>, Irkham<sup>a</sup>, Salsha Zulqaidah<sup>a</sup>,  
Atiek Rostika Noviyanti<sup>a</sup>, Siti Rochani<sup>b</sup>, Seda Nur Topkaya<sup>c</sup>, Yasuaki Einaga<sup>d</sup>

<sup>a</sup>Department of Chemistry, Faculty of Mathematics and Natural Sciences, Universitas Padjadjaran,  
Indonesia. Email : [yeni.w.hartati@unpad.ac.id](mailto:yeni.w.hartati@unpad.ac.id)

<sup>b</sup>Mining Technology Research Center, National Research and Innovation Agency, Indonesia.

<sup>c</sup>Department of Pharmacy, Izmir Katip Celebi University, Turkey.

<sup>d</sup>Department of Chemistry, Keio University, 3-4-1 Hiyashi, Yokohama 223-8522, Japan.

Table of Contents:

(Table S1) Peak current of potassium ferricyanide on variations in RBD S concentrations,  
LoD and LoQ calculation.

(Table S2) Precision and accuracy data calculation.

**Table S1. Data on the peak current of potassium ferricyanide on variations in RBD S protein concentrations**

| Antigen concentration (x) / (ng/mL) | $\Delta I \pm SD$ (y) / ( $\mu A$ ) |
|-------------------------------------|-------------------------------------|
| 0.125                               | $0.352 \pm 0.030$                   |
| 0.25                                | $0.413 \pm 0.010$                   |
| 0.5                                 | $0.455 \pm 0.012$                   |
| 1                                   | $0.561 \pm 0.030$                   |
| 2                                   | $0.803 \pm 0.011$                   |

Linier regression :

$$Y = 0.232x + 0.337$$

$$\text{Standard error} = \sqrt{\frac{\sum(y-y \text{ predict})^2}{N-2}} = 13.86153 \times 10^{-3}$$

$$\sigma \text{ intercept} = SE \sqrt{\frac{\sum Xi^2}{N \sum(x-\bar{x})^2}} = 9.36352 \times 10^{-3}$$

$$\text{LoD} = \frac{3 \times \sigma}{\text{Slope}} = 0.1211 \text{ ng/mL or } 1.211 \times 10^2 \text{ pg/mL}$$

$$\text{LoQ} = \frac{10 \times \sigma}{\text{Slope}} = 0.4036 \text{ ng/mL or } 4.036 \times 10^2 \text{ pg/mL}$$

**Table S2. Precision data**

| Antigen concentration (ng/mL) | I ( $\mu A$ ) | I $\pm$ SD ( $\mu A$ ) |
|-------------------------------|---------------|------------------------|
| 0.5                           | 2.945         | $2.9721 \pm 0.0434$    |
|                               | 2.982         |                        |
|                               | 2.898         |                        |
|                               | 2.993         |                        |
|                               | 2.998         |                        |
|                               | 3.017         |                        |

$$CV = \frac{SD}{I} \times 100\% = 1.46\%$$

$$\text{Precision} = 100\% - CV = 98.54\%$$

\*In probability theory and statistics, the coefficient of variation (CV), also known as relative standard deviation (RSD), so that RSD = 1.46%

### Accuracy

$$X_{\text{observed}} = 0.48765 \text{ ng/mL}$$

$$X_{\text{true}} = 0.5 \text{ ng/mL}$$

$$\% \text{Error} = \left| \frac{X_{\text{observed}} - X_{\text{true}}}{X_{\text{true}}} \right| \times 100\% = 2.47\%$$

$$\text{Accuracy} = 100\% - \% \text{error} = 97.53\%$$
